# Supplementary material
Source: PubMed Central journal article supplement (PMC4458369)
Supplement: NIHMS579988-supplement-13361_2014_859_MOESM1_ESM.pdf [file NIHMS579988-supplement-13361_2014_859_MOESM1_ESM.pdf]

# **Absolute Quantitation of Glycosylation Site Occupancy Using Isotopically Labeled Standards and LC-MS**

*Zhikai Zhu, Eden P. Go and Heather Desaire\**

The Ralph N. Adams Institute for Bioanalytical Chemistry and Department of Chemistry,  
University of Kansas, Lawrence, KS 66047, United States

## **Supplementary Material**

\* Corresponding author. Address: 2030 Becker Drive, Lawrence, KS 66047. Phone: 785-864-3015, Fax: 785-864-5396, E-mail: hdesaire@ku.edu.

**Supplementary Table 1.** Peptide sequences contained in fetuin and their heavy isotope-labeled peptide standard counterparts. Each standard has <sup>13</sup>C and <sup>15</sup>N labeled on the terminal lysine or arginine residue. The potential glycosylation site on P4 is labeled in blue.

| Peptide | Sequence                      | Monoisotopic Mass | Charge State | Precursor <i>m/z</i> |
|---------|-------------------------------|-------------------|--------------|----------------------|
| P1      | EVVDPTK                       | 786.4123          | 1+           | 787.4196             |
| *P1     | EVVDPT*K                      | 794.4265          | 1+           | 795.4338             |
| P2      | HTLNQIDSVK                    | 1153.6091         | 2+           | 577.8118             |
| *P2     | HTLNQIDSV*K                   | 1161.6233         | 2+           | 581.8189             |
| P3      | EPACDDPDTEQAALAAVDYINK        | 2405.0693         | 3+           | 802.6970             |
| *P3     | EPACDDPDTEQAALAAVDYIN*K       | 2413.0835         | 3+           | 805.3684             |
| P4      | VVHAVEVALATFNAESNGSYLQLVEISR  | 3015.5665         | 3+           | 1006.1961            |
| *P4     | VVHAVEVALATFNAESNGSYLQLVEIS*R | 3025.5748         | 3+           | 1009.5322            |

**Supplementary Table 2.** The percent glycosylation site occupancy (%) determined by comparing the quantitation results of different normal peptides (P1-3) against the non-glycosylated peptide (P4). Fetuin samples of varied concentrations (0.03-1.5  $\mu\text{g}/\mu\text{L}$ ) were analyzed.

| Concentration<br>( $\mu\text{g}/\mu\text{L}$ ) | C1 = 0.03      | C2 = 0.15      | C3 = 0.6       | C4 = 1.5       |
|------------------------------------------------|----------------|----------------|----------------|----------------|
| P1 & P4                                        | 86.2 $\pm$ 2.8 | 90.8 $\pm$ 2.5 | 90.3 $\pm$ 0.7 | 91.4 $\pm$ 1.0 |
| P2 & P4                                        | 86.2 $\pm$ 0.8 | 88.8 $\pm$ 0.3 | 88.4 $\pm$ 0.7 | 91.1 $\pm$ 0.9 |
| P3 & P4                                        | 86.4 $\pm$ 2.4 | 88.4 $\pm$ 0.4 | 89.0 $\pm$ 0.4 | 90.2 $\pm$ 0.9 |

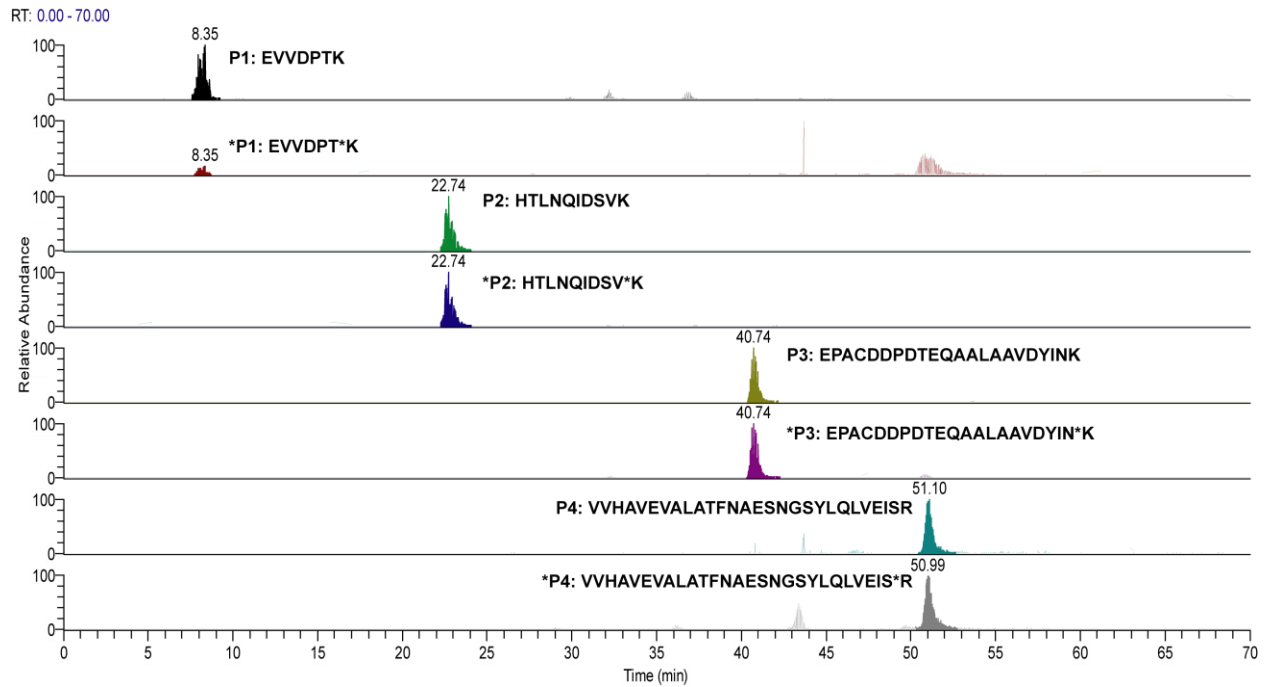

**Supplementary Figure 1.** Representative extracted ion chromatograms of the tryptic peptides generated from fetuin and their spiked heavy isotope-labeled standards. The peak area of the monoisotopic peak ( $m/z$  values listed in Supplementary Table 1) of each peptide is used in the quantitative analysis.

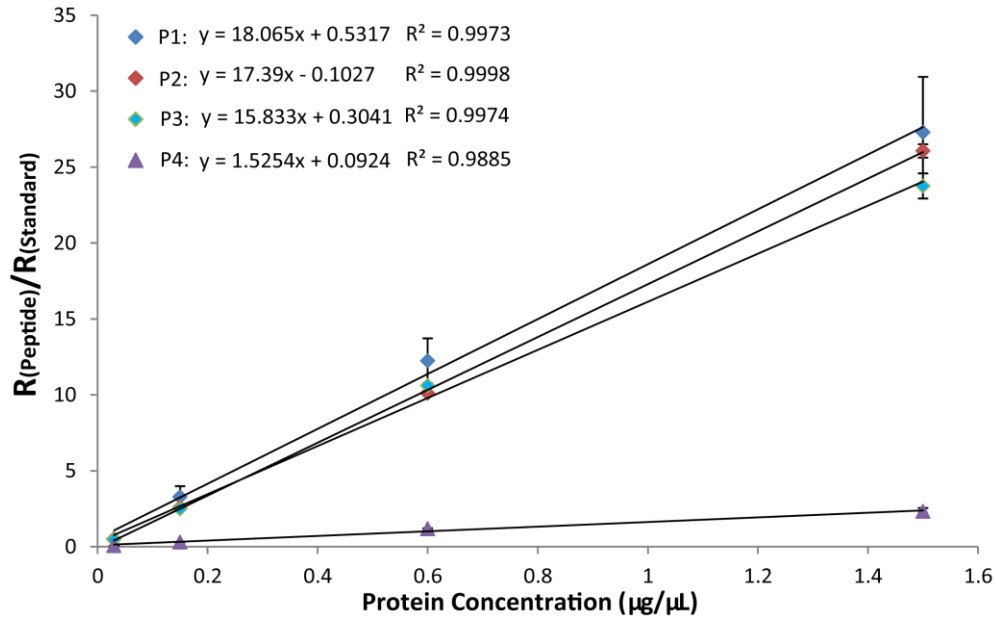

**Supplementary Figure 2.** The ratio of each fetuin peptide's (P1-4) signal response (peak area) over the signal response of the corresponding heavy isotope labeled peptide standard (\*P1-4), was plotted against the fetuin concentration (0.03-1.5  $\mu\text{g}/\mu\text{L}$ ), to construct the four calibration curves shown in this figure. Each sample was spiked with the same amount (50 pmol) of the four heavy isotope labeled peptide standards (\*P1-4). Each dilution was analyzed in triplicate.
